# Supplementary material for: Pan-cancer analysis of the prognostic and immunological role of GJB2: a potential target for survival and immunotherapy
Source: Front Oncol. 2023 Jun 23;13:1110207. doi: 10.3389/fonc.2023.1110207 (PMC10327570; doi:10.3389/fonc.2023.1110207)
Supplement: Supplementary file 2 [file Table_2.xlsx]

## Sheet: table 2  GO analysis
Category	Term	Count	%	PValue	Genes	List Total	Pop Hits	Pop Total	Fold Enrichment	Bonferroni	Benjamini	FDR
GOTERM_MF_DIRECT	GO:0005243~gap junction channel activity	18	18.75	9.4e-37	GJE1, GJC1, PANX1, GJD2, GJA1, GJB2, GJC3, GJD4, GJC2, GJB1, GJD3, GJA3, GJB4, GJB3, GJA5, GJB6, GJB5, GJA8	88	22	18869	175.435	1.62e-34	1.62e-34	1.53e-34
GOTERM_CC_DIRECT	GO:0005922~connexin complex	17	17.7083	6.9e-34	GJE1, GJC1, GJD2, GJA1, GJB2, GJC3, GJD4, GJC2, GJB1, GJD3, GJA3, GJB4, GJB3, GJA5, GJB6, GJB5, GJA8	95	22	20562	167.251	1.08e-31	1.08e-31	9.93e-32
GOTERM_CC_DIRECT	GO:0001533~cornified envelope	17	17.7083	8.81e-25	DSP, SPRR2E, CNFN, SERPINB5, TGM1, KRT17, KRT16, DSG1, PKP1, DSG3, PKP3, SPRR2A, DSC2, IVL, SPRR1B, DSC3, SPRR2D	95	59	20562	62.3647	1.38e-22	6.92e-23	6.34e-23
GOTERM_BP_DIRECT	GO:0007605~sensory perception of sound	20	20.8333	1.1e-21	WFS1, TMPRSS3, PCDH15, TSPEAR, MYO7A, ESPN, POU3F4, TJP1, TMIE, GJB2, GJC3, LOXHD1, MYO15A, GJB6, CDH23, OTOG, OTOF, KCNQ4, SLC26A4, PDZD7	93	159	19308	26.1148	6.47e-19	6.46e-19	6.15e-19
GOTERM_BP_DIRECT	GO:0007267~cell-cell signaling	21	21.875	5.41e-20	GJE1, GJC1, PANX1, GJD2, PANX2, GJA1, GJB2, GJC3, GJD4, GJC2, GJB1, GJD3, GJA3, GJB4, GJB3, GJA5, GJB6, GJB5, GJA8, S100A9, PANX3	93	230	19308	18.956	3.17e-17	1.58e-17	1.51e-17
GOTERM_CC_DIRECT	GO:0005921~gap junction	11	11.4583	4.32e-19	PANX1, GJC1, TJP1, PANX2, GJB2, GJA1, GJC2, GJB3, GJB6, GJA5, PANX3	95	20	20562	119.043	6.78e-17	2.26e-17	2.07e-17
GOTERM_BP_DIRECT	GO:0007154~cell communication	12	12.5	1.19e-17	GJC1, GJD2, GJB2, GJB1, GJD3, GJA3, GJB3, GJB6, GJA5, GJB5, GJA8, GJE1	93	37	19308	67.3339	6.95e-15	2.31e-15	2.2e-15
GOTERM_BP_DIRECT	GO:0031424~keratinization	14	14.5833	3.8e-17	SPRR2E, KRT5, CNFN, TGM1, KRT17, KRT16, SFN, SPRR2A, KRT6C, IVL, SPRR1B, KRT6B, KRT6A, SPRR2D	93	77	19308	37.7478	2.23e-14	5.56e-15	5.3e-15
GOTERM_BP_DIRECT	GO:0055085~transmembrane transport	17	17.7083	2.86e-14	SLC10A6, GJE1, GJD2, PANX2, GJB2, GJC3, GJD4, GJC2, GJB1, GJA3, GJB4, GJB3, GJA5, GJB6, GJB5, GJA8, PANX3	93	241	19308	14.6449	1.68e-11	3.35e-12	3.19e-12
GOTERM_BP_DIRECT	GO:0008544~epidermis development	12	12.5	2.17e-13	SPRR2E, KRTDAP, DSP, CERS3, FABP5, KRT14, GJB5, KRT5, SPRR2A, SPRR1B, S100A7, SPRR2D	93	84	19308	29.659	1.27e-10	2.11e-11	2.01e-11
GOTERM_BP_DIRECT	GO:0016264~gap junction assembly	7	7.29167	2.76e-13	GJC1, GJB2, GJA1, GJB1, GJD3, GJB6, GJA5	93	8	19308	181.661	1.61e-10	2.3e-11	2.19e-11
GOTERM_CC_DIRECT	GO:0030057~desmosome	8	8.33333	1.49e-11	DSP, PERP, DSG1, PKP1, PKP3, DSG3, DSC2, DSC3	95	25	20562	69.2615	2.35e-09	5.86e-10	5.38e-10
GOTERM_CC_DIRECT	GO:0032420~stereocilium	8	8.33333	1.62e-10	LOXHD1, MYO15A, PCDH15, CDH23, TSPEAR, MYO7A, ESPN, PDZD7	95	34	20562	50.9276	2.54e-08	5.08e-09	4.66e-09
GOTERM_BP_DIRECT	GO:1990349~gap junction-mediated intercellular transport	5	5.20833	7.19e-09	GJB2, GJA3, GJB4, GJB6, GJA8	93	6	19308	173.011	4.21e-06	5.26e-07	5e-07
GOTERM_BP_DIRECT	GO:0030216~keratinocyte differentiation	8	8.33333	1.39e-08	DSP, CERS3, TGM1, KRT16, SPRR2A, IVL, SPRR1B, S100A7	93	60	19308	27.6817	8.15e-06	9.04e-07	8.61e-07
GOTERM_BP_DIRECT	GO:0010644~cell communication by electrical coupling	5	5.20833	1.67e-08	GJB2, GJA1, GJC2, GJB6, GJA5	93	7	19308	148.295	9.79e-06	9.77e-07	9.31e-07
GOTERM_BP_DIRECT	GO:0045109~intermediate filament organization	8	8.33333	2.74e-08	DSP, KRT17, KRT16, KRT14, KRT5, KRT6C, KRT6B, KRT6A	93	66	19308	25.1652	1.61e-05	1.46e-06	1.39e-06
GOTERM_MF_DIRECT	GO:0005198~structural molecule activity	10	10.4167	2.01e-07	SPRR2E, PANX1, DSP, PANX2, KRT17, KRT16, KRT14, OTOG, PANX3, SPRR1B	88	187	18869	11.4663	3.45e-05	1.73e-05	1.63e-05
GOTERM_BP_DIRECT	GO:0098609~cell-cell adhesion	10	10.4167	3.08e-07	DSP, TJP1, TRIM29, PERP, DSG1, PKP1, PKP3, DSG3, DSC2, DSC3	93	190	19308	10.927	0.00018	1.5e-05	1.43e-05
GOTERM_MF_DIRECT	GO:1903763~gap junction channel activity involved in cell communication by electrical coupling	4	4.16667	3.77e-07	GJB2, GJA1, GJC2, GJB6	88	4	18869	214.42	6.49e-05	2.16e-05	2.05e-05
GOTERM_MF_DIRECT	GO:0030280~structural constituent of epidermis	6	6.25	7.2e-07	SPRR2E, PKP1, KRT5, KRT6C, KRT6B, KRT6A	88	37	18869	34.7709	0.000124	3.1e-05	2.93e-05
GOTERM_BP_DIRECT	GO:1905867~epididymis development	4	4.16667	1.04e-06	GJB2, GJA1, GJB1, GJB5	93	5	19308	166.09	0.000609	4.68e-05	4.45e-05
GOTERM_CC_DIRECT	GO:0030054~cell junction	10	10.4167	1.17e-06	DSP, TJP1, GJA1, GJB4, GJB3, GJB6, CLCA2, PKP3, S100A9, DSC3	95	232	20562	9.3294	0.000184	3.07e-05	2.82e-05
GOTERM_BP_DIRECT	GO:0060088~auditory receptor cell stereocilium organization	5	5.20833	1.77e-06	STRC, PCDH15, CDH23, MYO7A, PDZD7	93	19	19308	54.635	0.00103734	7.4e-05	7.05e-05
GOTERM_CC_DIRECT	GO:0032426~stereocilium tip	5	5.20833	2.31e-06	TMC1, STRC, CDH23, ESPN, PDZD7	95	21	20562	51.5338	0.000363	5.09e-05	4.66e-05
GOTERM_CC_DIRECT	GO:0005882~intermediate filament	8	8.33333	2.59e-06	DSP, KRT17, KRT16, KRT14, PKP1, KRT5, KRT6C, KRT6A	95	133	20562	13.0191	0.000407	5.09e-05	4.66e-05
GOTERM_CC_DIRECT	GO:0014704~intercalated disc	6	6.25	2.92e-06	GJC1, DSP, TJP1, GJA1, GJA5, DSC2	95	49	20562	26.5031	0.000458	5.09e-05	4.67e-05
GOTERM_MF_DIRECT	GO:0071253~connexin binding	4	4.16667	3.27e-06	TJP1, GJA1, CNST, GJA5	88	7	18869	122.526	0.000562	0.000112	0.000107
GOTERM_MF_DIRECT	GO:0005200~structural constituent of cytoskeleton	7	7.29167	1e-05	DSP, KRT16, KRT14, KRT5, TUBA4A, KRT6B, KRT6A	88	107	18869	14.0275	0.00172645	0.000288	0.000273
GOTERM_BP_DIRECT	GO:0018149~peptide cross-linking	5	5.20833	1.2e-05	SPRR2E, DSP, TGM1, IVL, SPRR1B	93	30	19308	34.6022	0.00702506	0.000469	0.000447
GOTERM_BP_DIRECT	GO:0007043~cell-cell junction assembly	5	5.20833	3.49e-05	GJC1, TJP1, DSG1, PKP1, PKP3	93	39	19308	26.617	0.0202686	0.0012776	0.00121645
GOTERM_MF_DIRECT	GO:0055077~gap junction hemi-channel activity	3	3.125	6.29e-05	GJA1, GJA3, GJA5	88	3	18869	214.42	0.0107536	0.00135144	0.00128072
GOTERM_MF_DIRECT	GO:0086077~gap junction channel activity involved in AV node cell-bundle of His cell electrical coupling	3	3.125	6.29e-05	GJC1, GJD3, GJA5	88	3	18869	214.42	0.0107536	0.00135144	0.00128072
GOTERM_BP_DIRECT	GO:0086053~AV node cell to bundle of His cell communication by electrical coupling	3	3.125	6.72e-05	GJC1, GJC3, GJA5	93	3	19308	207.613	0.0385958	0.00218591	0.00208129
GOTERM_BP_DIRECT	GO:0007601~visual perception	8	8.33333	6.73e-05	GJC1, GJD2, KCNJ10, GJA3, WFS1, PCDH15, CDH23, MYO7A	93	211	19308	7.87158	0.0386484	0.00218591	0.00208129
GOTERM_BP_DIRECT	GO:0050910~detection of mechanical stimulus involved in sensory perception of sound	4	4.16667	8.11e-05	TMC1, STRC, PCDH15, PDZD7	93	18	19308	46.1362	0.0464214	0.00249739	0.00237786
GOTERM_BP_DIRECT	GO:0032496~response to lipopolysaccharide	7	7.29167	0.000105	TJP1, GJB2, GJA1, GJB6, S100A9, S100A8, S100A7	93	157	19308	9.25663	0.0598204	0.00307879	0.00293143
GOTERM_CC_DIRECT	GO:0045095~keratin filament	6	6.25	0.000121	KRT17, KRT14, KRT5, KRT6C, KRT6B, KRT6A	95	105	20562	12.3681	0.0187809	0.00189584	0.00173886
GOTERM_BP_DIRECT	GO:0002009~morphogenesis of an epithelium	4	4.16667	0.000131	KRT16, PCDH15, SERPINB5, KRT6A	93	21	19308	39.5453	0.0738123	0.00364488	0.00347042
GOTERM_BP_DIRECT	GO:0002931~response to ischemia	5	5.20833	0.000246	PANX1, PANX2, GJB2, GJA1, CAV1	93	64	19308	16.2198	0.134509	0.00655426	0.00624055
GOTERM_MF_DIRECT	GO:0022829~wide pore channel activity	3	3.125	0.000435	PANX1, PANX2, PANX3	88	7	18869	91.8945	0.0720639	0.00830846	0.00787372
GOTERM_MF_DIRECT	GO:0005509~calcium ion binding	12	12.5	0.000657	GJB2, PLA2G4E, PCDH15, CDH23, DSG1, OTOF, DSG3, S100A9, DSC2, S100A8, DSC3, S100A7	88	751	18869	3.42616	0.106919	0.011304	0.0107125
GOTERM_BP_DIRECT	GO:0050957~equilibrioception	3	3.125	0.000791	PCDH15, CDH23, MYO7A	93	9	19308	69.2043	0.371088	0.0192829	0.0183599
GOTERM_BP_DIRECT	GO:0050953~sensory perception of light stimulus	3	3.125	0.000791	PCDH15, CDH23, MYO7A	93	9	19308	69.2043	0.371088	0.0192829	0.0183599
GOTERM_CC_DIRECT	GO:0016021~integral component of membrane	40	41.6667	0.000981	TMPRSS3, TMPRSS4, PCDH15, LYPD3, GJE1, GJC1, NIPAL4, PANX1, PANX2, GJA1, GJC3, GJC2, CNST, GJA3, GJA5, CDH23, OTOF, GJA8, PANX3, CERS3, SLC10A6, KCNJ10, WFS1, CAV1, GJD2, RNF222, GJB2, TMIE, GJD4, GJB1, GJD3, GJB3, GJB6, GJB5, DSG1, KCNQ4, DSG3, SLC26A4, DSC2, DSC3	95	5415	20562	1.59883	0.142779	0.0139985	0.0128394
GOTERM_BP_DIRECT	GO:0002544~chronic inflammatory response	3	3.125	0.000986	GJA1, S100A9, S100A8	93	10	19308	62.2839	0.43896	0.0230677	0.0219636
GOTERM_MF_DIRECT	GO:0050786~RAGE receptor binding	3	3.125	0.00112503	S100A9, S100A8, S100A7	88	11	18869	58.4783	0.176024	0.0175914	0.0166709
GOTERM_BP_DIRECT	GO:0098911~regulation of ventricular cardiac muscle cell action potential	3	3.125	0.00120113	DSP, CAV1, DSC2	93	11	19308	56.6217	0.505539	0.0270255	0.0257319
GOTERM_BP_DIRECT	GO:0007156~homophilic cell adhesion via plasma membrane adhesion molecules	6	6.25	0.00139355	PCDH15, CDH23, DSG1, DSG3, DSC2, DSC3	93	172	19308	7.24231	0.55833	0.0301937	0.0287485
GOTERM_CC_DIRECT	GO:0016324~apical plasma membrane	8	8.33333	0.00169376	TJP1, GJA1, GJB6, CAV1, OTOG, DSG1, MYO7A, SLC26A4	95	376	20562	4.60515	0.233673	0.02216	0.0203251
GOTERM_BP_DIRECT	GO:0061844~antimicrobial humoral immune response mediated by antimicrobial peptide	5	5.20833	0.00183385	PGLYRP4, RNASE7, S100A9, S100A7, KRT6A	93	109	19308	9.52353	0.658915	0.0383144	0.0364806
GOTERM_CC_DIRECT	GO:0005911~cell-cell junction	6	6.25	0.00188979	PERP, DSG1, PKP3, DSG3, DSC2, DSC3	95	192	20562	6.76382	0.256939	0.0228228	0.020933
GOTERM_BP_DIRECT	GO:0086064~cell communication by electrical coupling involved in cardiac conduction	3	3.125	0.00196892	GJA1, GJD3, GJA5	93	14	19308	44.4885	0.684919	0.0383939	0.0365563
GOTERM_BP_DIRECT	GO:0032732~positive regulation of interleukin-1 production	3	3.125	0.00196892	PANX1, PANX2, PANX3	93	14	19308	44.4885	0.684919	0.0383939	0.0365563
GOTERM_CC_DIRECT	GO:0070062~extracellular exosome	21	21.875	0.00218491	DSP, KRT5, SBSN, TUBA4A, DNM2, TGM1, FABP5, MYO15A, KRT16, KRT14, CRYL1, SFN, DSG3, SLC26A4, KRT6C, S100A9, DSC2, IVL, S100A8, KRT6B, KRT6A	95	2218	20562	2.04927	0.29065	0.0245022	0.0224733
GOTERM_BP_DIRECT	GO:0042472~inner ear morphogenesis	4	4.16667	0.00241768	TMIE, MYO15A, FOXI1, KCNQ4	93	56	19308	14.8295	0.757917	0.0456239	0.0434402
GOTERM_BP_DIRECT	GO:0045104~intermediate filament cytoskeleton organization	3	3.125	0.00444625	DSP, KRT16, KRT6C	93	21	19308	29.659	0.926562	0.0812829	0.0773925
GOTERM_CC_DIRECT	GO:0005886~plasma membrane	36	37.5	0.00447365	TMPRSS4, PCDH15, LYPD3, LYPD5, GJC1, TGM1, PANX1, PANX2, GJA1, CNST, PERP, CDH23, CLCA2, GJA8, PDZD7, PANX3, DSP, SLC10A6, KCNJ10, PLA2G4E, CAV1, DNM2, GJD2, TJP1, GJB2, FABP5, PKP1, DSG1, KCNQ4, DSG3, PKP3, SLC26A4, S100A9, S100A8, DSC2, DSC3	95	5071	20562	1.53656	0.505367	0.0468242	0.0429471
GOTERM_BP_DIRECT	GO:0051493~regulation of cytoskeleton organization	3	3.125	0.00677562	TJP1, S100A9, S100A8	93	26	19308	23.9553	0.981389	0.120113	0.114364
GOTERM_BP_DIRECT	GO:0006812~cation transport	3	3.125	0.00838633	PANX1, PANX2, PANX3	93	29	19308	21.4772	0.99281	0.144294	0.137388
GOTERM_CC_DIRECT	GO:0005912~adherens junction	5	5.20833	0.00853555	TJP1, TRIM29, PKP1, PKP3, DSC2	95	175	20562	6.18406	0.739677	0.083755	0.0768199
GOTERM_MF_DIRECT	GO:0048306~calcium-dependent protein binding	4	4.16667	0.00885028	WFS1, S100A9, S100A8, S100A7	88	92	18869	9.32263	0.783253	0.113034	0.10712
GOTERM_MF_DIRECT	GO:0086020~gap junction channel activity involved in SA node cell-atrial cardiac muscle cell electrical coupling	2	2.08333	0.00920046	GJC1, GJA5	88	2	18869	214.42	0.796034	0.113034	0.10712
GOTERM_MF_DIRECT	GO:0086075~gap junction channel activity involved in cardiac conduction electrical coupling	2	2.08333	0.00920046	GJA1, GJA5	88	2	18869	214.42	0.796034	0.113034	0.10712
GOTERM_BP_DIRECT	GO:0070488~neutrophil aggregation	2	2.08333	0.00950727	S100A9, S100A8	93	2	19308	207.613	0.996294	0.145285	0.138331
GOTERM_BP_DIRECT	GO:0010652~positive regulation of cell communication by chemical coupling	2	2.08333	0.00950727	GJA1, GJA5	93	2	19308	207.613	0.996294	0.145285	0.138331
GOTERM_BP_DIRECT	GO:0086021~SA node cell to atrial cardiac muscle cell communication by electrical coupling	2	2.08333	0.00950727	GJC1, GJA5	93	2	19308	207.613	0.996294	0.145285	0.138331
GOTERM_BP_DIRECT	GO:0035633~maintenance of permeability of blood-brain barrier	3	3.125	0.00954601	TJP1, GJA1, GJB6	93	31	19308	20.0916	0.996378	0.145285	0.138331
GOTERM_BP_DIRECT	GO:0030307~positive regulation of cell growth	4	4.16667	0.00968566	KRT17, SFN, S100A9, S100A8	93	92	19308	9.02665	0.996666	0.145285	0.138331
GOTERM_BP_DIRECT	GO:0050832~defense response to fungus	3	3.125	0.0120653	RNASE7, S100A9, S100A8	93	35	19308	17.7954	0.999186	0.176455	0.168009
GOTERM_BP_DIRECT	GO:0032570~response to progesterone	3	3.125	0.0134222	GJB2, CAV1, DSG1	93	37	19308	16.8335	0.999636	0.186952	0.178004
GOTERM_BP_DIRECT	GO:2001244~positive regulation of intrinsic apoptotic signaling pathway	3	3.125	0.0134222	CAV1, S100A9, S100A8	93	37	19308	16.8335	0.999636	0.186952	0.178004
GOTERM_BP_DIRECT	GO:0045907~positive regulation of vasoconstriction	3	3.125	0.0141244	GJA1, CAV1, GJA5	93	38	19308	16.3905	0.99976	0.189159	0.180105
GOTERM_BP_DIRECT	GO:1902373~negative regulation of mRNA catabolic process	2	2.08333	0.0142273	PKP1, PKP3	93	3	19308	138.409	0.999774	0.189159	0.180105
GOTERM_MF_DIRECT	GO:0005516~calmodulin binding	5	5.20833	0.0149473	TJP1, MYO15A, WFS1, KCNQ4, MYO7A	88	205	18869	5.22977	0.925005	0.171395	0.162427
GOTERM_BP_DIRECT	GO:0086091~regulation of heart rate by cardiac conduction	3	3.125	0.0170876	DSP, CAV1, DSC2	93	42	19308	14.8295	0.999959	0.222139	0.211507
GOTERM_MF_DIRECT	GO:0035662~Toll-like receptor 4 binding	2	2.08333	0.0183172	S100A9, S100A8	88	4	18869	107.21	0.958405	0.19691	0.186607
GOTERM_BP_DIRECT	GO:0032119~sequestering of zinc ion	2	2.08333	0.0189251	S100A9, S100A8	93	4	19308	103.806	0.999986	0.235557	0.224283
GOTERM_BP_DIRECT	GO:0048563~post-embryonic animal organ morphogenesis	2	2.08333	0.0189251	CDH23, MYO7A	93	4	19308	103.806	0.999986	0.235557	0.224283
GOTERM_CC_DIRECT	GO:0005887~integral component of plasma membrane	14	14.5833	0.0195297	TMC1, KCNJ10, CAV1, PCDH15, GJA1, GJB2, GJD3, GJA3, GJB4, PERP, GJA5, CLCA2, GJA8, SLC26A4	95	1508	20562	2.00941	0.954793	0.180362	0.165428
GOTERM_MF_DIRECT	GO:0051015~actin filament binding	5	5.20833	0.0205979	PANX1, MYO15A, GJB6, MYO7A, ESPN	88	226	18869	4.74382	0.97212	0.208402	0.197497
GOTERM_MF_DIRECT	GO:0086083~cell adhesive protein binding involved in bundle of His cell-Purkinje myocyte communication	2	2.08333	0.0228445	DSP, DSC2	88	5	18869	85.7682	0.981217	0.218292	0.206869
GOTERM_BP_DIRECT	GO:0018119~peptidyl-cysteine S-nitrosylation	2	2.08333	0.0236008	S100A9, S100A8	93	5	19308	83.0452	0.999999	0.272769	0.259713
GOTERM_BP_DIRECT	GO:0045110~intermediate filament bundle assembly	2	2.08333	0.0236008	KRT14, PKP1	93	5	19308	83.0452	0.999999	0.272769	0.259713
GOTERM_BP_DIRECT	GO:0048839~inner ear development	3	3.125	0.023723	GJB2, GJB6, PCDH15	93	50	19308	12.4568	0.999999	0.272769	0.259713
GOTERM_BP_DIRECT	GO:0050830~defense response to Gram-positive bacterium	4	4.16667	0.0237798	PGLYRP4, RNASE7, SPRR2A, KRT6A	93	129	19308	6.43761	0.999999	0.272769	0.259713
GOTERM_CC_DIRECT	GO:0016323~basolateral plasma membrane	5	5.20833	0.0240753	DSP, TJP1, KCNJ10, CAV1, OTOF	95	239	20562	4.52808	0.978205	0.20999	0.192603
GOTERM_BP_DIRECT	GO:0045087~innate immune response	8	8.33333	0.0242594	PGLYRP4, TRIM29, KRT16, RNASE7, IL36RN, S100A9, S100A8, S100A7	93	599	19308	2.77279	0.999999	0.272918	0.259855
GOTERM_MF_DIRECT	GO:0050544~arachidonic acid binding	2	2.08333	0.0273511	S100A9, S100A8	88	6	18869	71.4735	0.991519	0.247599	0.234643
GOTERM_BP_DIRECT	GO:0034220~ion transmembrane transport	4	4.16667	0.0277641	GJC1, GJA1, GJD3, CLCA2	93	137	19308	6.06169	1	0.295158	0.28103
GOTERM_BP_DIRECT	GO:0086073~bundle of His cell-Purkinje myocyte adhesion involved in cell communication	2	2.08333	0.0282544	DSP, DSC2	93	6	19308	69.2043	1	0.295158	0.28103
GOTERM_BP_DIRECT	GO:0002934~desmosome organization	2	2.08333	0.0282544	DSP, PERP	93	6	19308	69.2043	1	0.295158	0.28103
GOTERM_BP_DIRECT	GO:0060117~auditory receptor cell development	2	2.08333	0.0282544	TMC1, PDZD7	93	6	19308	69.2043	1	0.295158	0.28103
GOTERM_CC_DIRECT	GO:0005829~cytosol	35	36.4583	0.028786	SPRR2E, TGM1, FAM83G, CLCA2, OTOG, OTOF, SFN, SPRR2A, KRT6C, KRT6B, KRT6A, SPRR2D, PLA2G4E, FBXO2, CTNNBIP1, KRT5, MYO7A, TUBA4A, DNM2, TJP1, GJB2, KRT17, FABP5, KRT16, GJB6, KRT14, CRYL1, DSG1, DSG3, S100A9, IVL, S100A8, DSC2, SPRR1B, S100A7	95	5510	20562	1.37486	0.989804	0.237864	0.218168
GOTERM_CC_DIRECT	GO:0101003~ficolin-1-rich granule membrane	3	3.125	0.0317806	DSP, DSG1, PKP1	95	61	20562	10.6447	0.993721	0.249478	0.228821
GOTERM_BP_DIRECT	GO:0008104~protein localization	4	4.16667	0.0326452	GJA1, CAV1, SFN, MYO7A	93	146	19308	5.68802	1	0.335043	0.319007
GOTERM_BP_DIRECT	GO:0042048~olfactory behavior	2	2.08333	0.0374959	GJB4, WFS1	93	8	19308	51.9032	1	0.365585	0.348087
GOTERM_BP_DIRECT	GO:0010649~regulation of cell communication by electrical coupling	2	2.08333	0.0374959	GJA1, GJA5	93	8	19308	51.9032	1	0.365585	0.348087
GOTERM_BP_DIRECT	GO:0035425~autocrine signaling	2	2.08333	0.0374959	S100A9, S100A8	93	8	19308	51.9032	1	0.365585	0.348087
GOTERM_CC_DIRECT	GO:0005856~cytoskeleton	7	7.29167	0.0377091	DSP, KRT17, KRT16, KRT14, S100A9, S100A8, TUBA4A	95	541	20562	2.80054	0.997606	0.28192	0.258577
GOTERM_MF_DIRECT	GO:0097110~scaffold protein binding	3	3.125	0.0403959	PANX1, DSP, KRT5	88	69	18869	9.32263	0.999169	0.339594	0.321825
GOTERM_CC_DIRECT	GO:0060091~kinocilium	2	2.08333	0.0404072	STRC, CDH23	95	9	20562	48.0982	0.99846	0.28836	0.264483
GOTERM_MF_DIRECT	GO:0050839~cell adhesion molecule binding	3	3.125	0.0414621	DSP, TJP1, PKP3	88	70	18869	9.18945	0.999313	0.339594	0.321825
GOTERM_BP_DIRECT	GO:0003158~endothelium development	2	2.08333	0.042084	GJA1, GJA5	93	9	19308	46.1362	1	0.397083	0.378077
GOTERM_BP_DIRECT	GO:0086014~atrial cardiac muscle cell action potential	2	2.08333	0.042084	GJC1, GJA1	93	9	19308	46.1362	1	0.397083	0.378077
GOTERM_CC_DIRECT	GO:0016328~lateral plasma membrane	3	3.125	0.0440672	GJB2, GJB1, DSG1	95	73	20562	8.89488	0.999155	0.29304	0.268776
GOTERM_CC_DIRECT	GO:0005916~fascia adherens	2	2.08333	0.0447959	DSP, GJA1	95	10	20562	43.2884	0.99925	0.29304	0.268776
GOTERM_BP_DIRECT	GO:2000810~regulation of bicellular tight junction assembly	2	2.08333	0.0466505	TJP1, GJA1	93	10	19308	41.5226	1	0.433183	0.412449
